# Supplementary material
Source: Royal Society of Chemistry journal article supplement (doi:10.1039/d6nj00557h)
Supplement: d6nj00557h1.pdf [file d6nj00557h1.pdf]

## Supporting Information

### **Facile synthesis of zinc chloride/formic acid based deep eutectic solvents for mild and efficient dissolution of collagen with high concentration**

Minggao Deng,<sup>a,b</sup> Hao Jiang,<sup>a,b</sup> Cong Bai,<sup>a</sup> Hui Chen<sup>a,b</sup> and Wentao Liu<sup>\*a,b</sup>

*<sup>a</sup>College of Biomass Science and Engineering, Sichuan University, Chengdu 610065, China*

*<sup>b</sup>Key Laboratory of Leather Chemistry and Engineering of Ministry of Education, Sichuan University, Chengdu 610065, China*

\*Corresponding author:

Wentao Liu, [liuwt@scu.edu.cn](mailto:liuwt@scu.edu.cn)

#### **Contents:**

Figure S1 to S5

Table S1 to S7

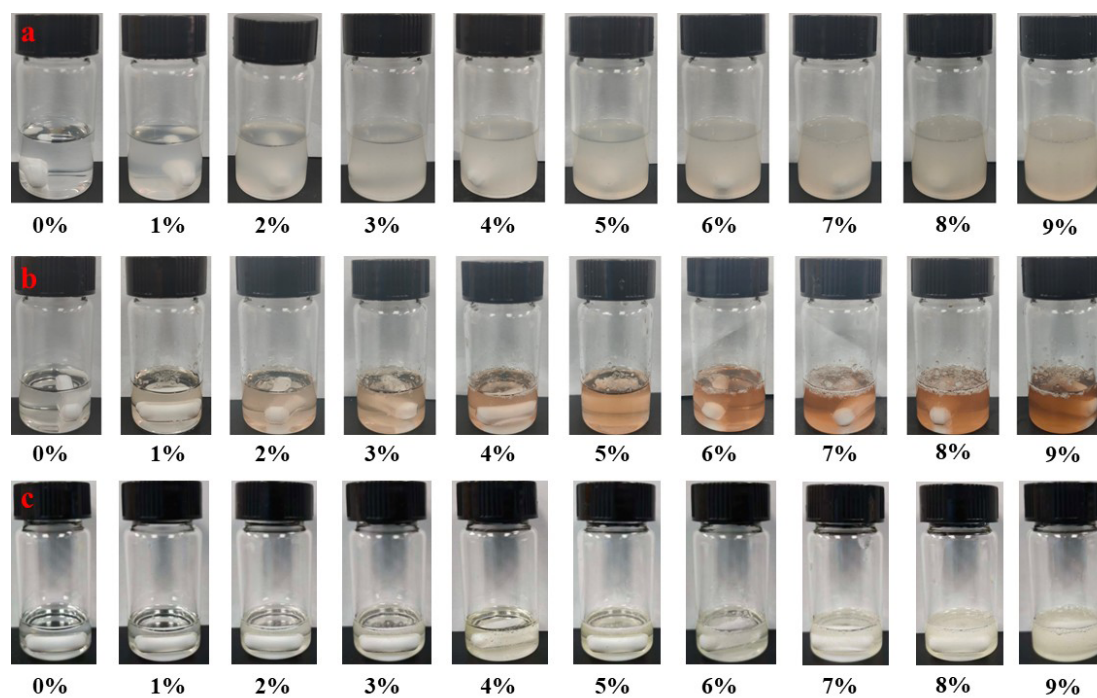

**Figure S1.** Photographs of the dissolution of collagen over a range of concentrations (0% ~ 9%, w/w) using different solvents at 4 °C. (a) Formic acid. (b) The DES of ZnCl<sub>2</sub>:FA(1:5). (c) The DES of U:LA(1:2).

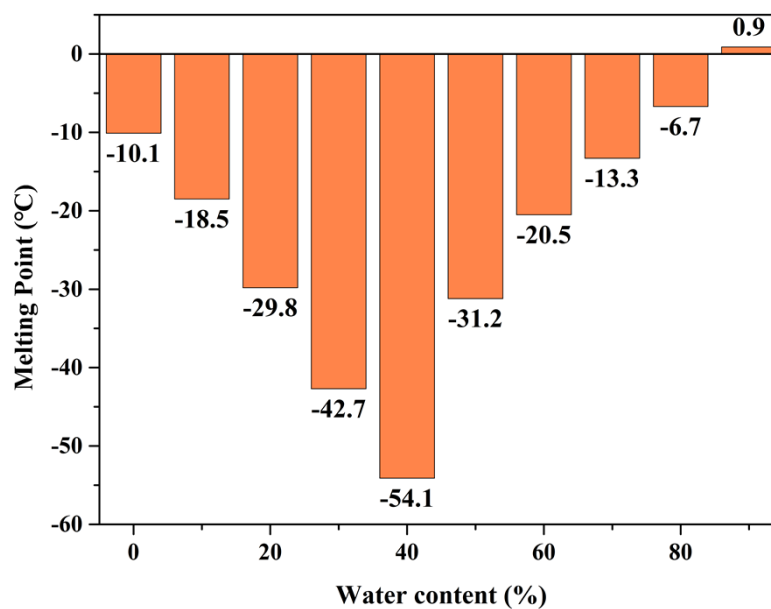

**Figure S2.** The melting points of the DESs of ZnCl<sub>2</sub>:FA(1:5) with different water contents.

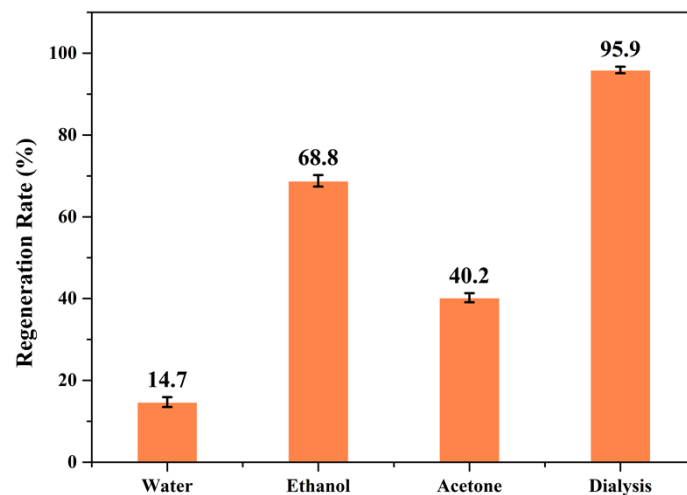

**Figure S3.** The regeneration rates of collagen obtained by using the immersion method in different precipitants (water, ethanol, and acetone) and the dialysis method.

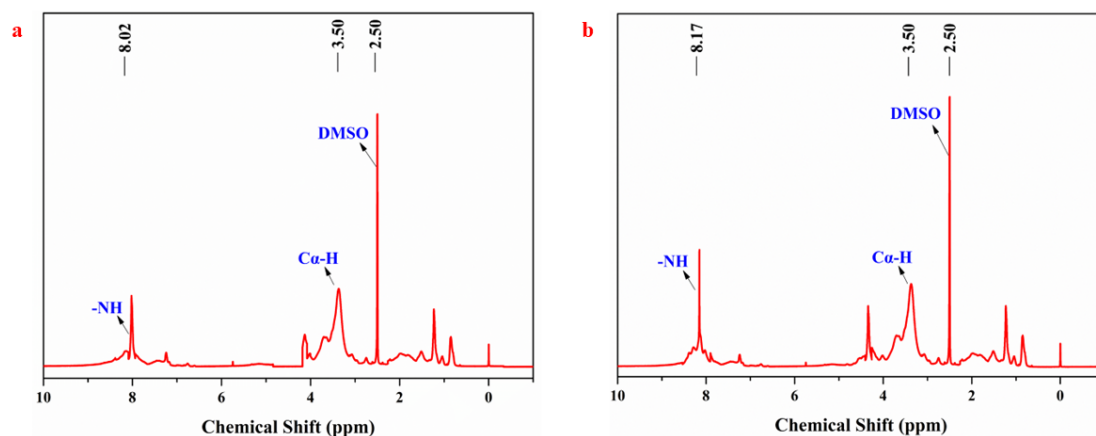

**Figure S4.** The  $^1\text{H}$  NMR spectra of (a) the original collagen and (b) the DES-collagen solution.

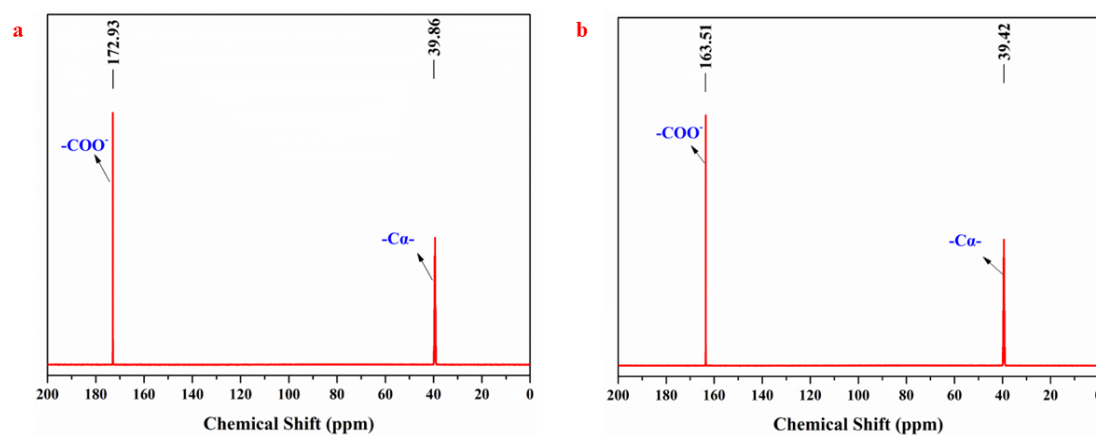

**Figure S5.** The  $^{13}\text{C}$  NMR spectra of (a) the original collagen and (b) the DES-collagen solution.

**Table S1.** Comparison of the solubility of collagen in different solvent systems.

| Solvents                                                    | Temperature (°C) | Solubility (wt%) | Reference |
|-------------------------------------------------------------|------------------|------------------|-----------|
| EG: ZnCl <sub>2</sub> (4:1)                                 | 45               | 11               |           |
| EG: ZnCl <sub>2</sub> (4:1) + HCl                           | 45               | 16.6             |           |
| EG: ZnCl <sub>2</sub> (4:1)                                 | 70               | 18.5             | 13        |
| EG: ZnCl <sub>2</sub> (4:1) + HCl                           | 70               | 17               |           |
| EG: ZnCl <sub>2</sub> (4:1)                                 | 90               | 21               |           |
| EG: ZnCl <sub>2</sub> (4:1) + HCl                           | 90               | 22.5             |           |
| (EMIM)(Ac)/Na <sub>2</sub> HPO <sub>4</sub>                 | 25               | 3.9              |           |
| (EMIM)(Ac)/Na <sub>2</sub> HPO <sub>4</sub>                 | 30               | 5.5              |           |
| (EMIM)(Ac)/Na <sub>2</sub> HPO <sub>4</sub>                 | 35               | 6.5              | 19        |
| (EMIM)(Ac)/Na <sub>2</sub> HPO <sub>4</sub>                 | 40               | 7.8              |           |
| (EMIM)(Ac)/Na <sub>2</sub> HPO <sub>4</sub>                 | 45               | 10.5             |           |
| TBAH/DMSO/H <sub>2</sub> O                                  | 25               | 10.25            | 21        |
| Urea/HAc                                                    | -12              | 12               | 11        |
| NaAc/HAc (pH 3.0)                                           | 25               | 10               | 8         |
| ZnCl <sub>2</sub> :FA(1:5)<br>containing 40% (w/w)<br>water | 4                | 27.4             | This work |

EG: ethylene glycol; (EMIM)(Ac): 1-ethyl-3-methylimidazolium acetate ([EMIM][Ac]); TBAH: tetra-*n*-butylammonium hydroxide; HAc: acetic acid; FA: formic acid

**Table S2.** The FTIR spectra peak positions and the absorption ratios between the Amide III and 1450 cm<sup>-1</sup> peaks of the regenerated collagens from the dissolution of collagen in the DESs with different water contents, in comparison with those of the original collagen.

| Collagen sample | Wavenumber of characteristic peak (cm <sup>-1</sup> ) |         |         |          |           | $A_{(\text{amide III})}/A_{1450}$ |
|-----------------|-------------------------------------------------------|---------|---------|----------|-----------|-----------------------------------|
|                 | Amide A                                               | Amide B | Amide I | Amide II | Amide III |                                   |
| C               | 3329                                                  | 2930    | 1660    | 1555     | 1240      | 1.01                              |
| 30              | 3330                                                  | 2930    | 1660    | 1550     | 1242      | 1.03                              |
| 40              | 3330                                                  | 2929    | 1660    | 1550     | 1240      | 1.02                              |
| 50              | 3332                                                  | 2926    | 1654    | 1549     | 1235      | 1.04                              |

C: the original collagen; 30, 40, and 50: the regenerated collagens from the dissolution of collagen in the DESs of ZnCl<sub>2</sub>:FA(1:5) containing 30%, 40%, and 50% (w/w) water, respectively.

**Table S3.** The absorption ratios between the positive and negative peaks (Rpn) of the CD spectra of the regenerated collagens from the dissolution of collagen in the DESs with different water contents, in comparison with that of the original collagen.

| Collagen sample | Rpn   |
|-----------------|-------|
| C               | 0.121 |
| 30              | 0.051 |
| 40              | 0.063 |
| 50              | 0.002 |

C: the original collagen; 30, 40, and 50: the regenerated collagens from the dissolution of collagen in the DESs of ZnCl<sub>2</sub>:FA(1:5) containing 30%, 40%, and 50% (w/w) water, respectively.

**Table S4.** The FTIR spectra peak positions and the absorption ratios between the Amide III and 1450 cm<sup>-1</sup> peaks of the regenerated collagens from the dissolution of collagen in the DES of ZnCl<sub>2</sub>:FA(1:5) containing 40% (w/w) water for different periods of time, in comparison with those of the original collagen.

| Collagen sample | Wavenumber of characteristic peak (cm <sup>-1</sup> ) |         |         |          |           | A <sub>(amide III)</sub> /A <sub>1450</sub> |
|-----------------|-------------------------------------------------------|---------|---------|----------|-----------|---------------------------------------------|
|                 | Amide A                                               | Amide B | Amide I | Amide II | Amide III |                                             |
| C               | 3329                                                  | 2930    | 1660    | 1555     | 1240      | 1.01                                        |
| 0               | 3330                                                  | 2930    | 1660    | 1550     | 1240      | 1.02                                        |
| 8h              | 3330                                                  | 2929    | 1660    | 1550     | 1240      | 1.03                                        |
| 16h             | 3331                                                  | 2928    | 1658    | 1549     | 1238      | 1.04                                        |
| 1d              | 3332                                                  | 2932    | 1660    | 1552     | 1240      | 1.04                                        |
| 2d              | 3330                                                  | 2930    | 1660    | 1550     | 1242      | 1.05                                        |
| 4d              | 3330                                                  | 2929    | 1662    | 1550     | 1240      | 1.07                                        |
| 8d              | 3331                                                  | 2928    | 1659    | 1549     | 1239      | 1.07                                        |
| 16d             | 3332                                                  | 2930    | 1660    | 1550     | 1240      | 1.08                                        |
| 32d             | 3331                                                  | 2929    | 1658    | 1549     | 1237      | 1.10                                        |

C: the original collagen; 0: the regenerated collagen immediately after the dissolution of collagen in the DES; 8h, 16h, 1d, 2d, 4d, 8d, 16d, 32d: the regenerated collagens from the dissolution of collagen in the DES for 8 hours, 16 hours, 1 day, 2 days, 4 days, 8 days, 16 days, and 32 days, respectively.

**Table S5.** The absorption ratios between the positive and negative peaks (Rpn) of the CD spectra of the regenerated collagens from the dissolution of collagen in the DES of ZnCl<sub>2</sub>:FA(1:5) containing 40% (w/w) water for different periods of time, in comparison with that of the original collagen.

| Collagen sample | Rpn   |
|-----------------|-------|
| C               | 0.121 |
| 0               | 0.063 |
| 8h              | 0.056 |
| 16h             | 0.050 |
| 1d              | 0.046 |
| 2d              | 0.040 |
| 4d              | 0.034 |
| 8d              | 0.029 |
| 16d             | 0.016 |
| 32d             | —     |

C: the original collagen; 0: the regenerated collagen immediately after the dissolution of collagen in the DES; 8h, 16h, 1d, 2d, 4d, 8d, 16d, 32d: the regenerated collagens from the dissolution of collagen in the DES for 8 hours, 16 hours, 1 day, 2 days, 4 days, 8 days, 16 days, and 32 days, respectively.

**Table S6.** The thermal denaturation temperature ( $T_d$ ) values of the regenerated collagens from the dissolution of collagen in the DES of  $ZnCl_2:FA(1:5)$  containing 40% (w/w) water for different periods of time, in comparison with that of the original collagen.

| Collagen sample | $T_d$ (°C)     |
|-----------------|----------------|
| C               | $73.0 \pm 0.2$ |
| 0               | $71.6 \pm 0.3$ |
| 8h              | $70.5 \pm 0.4$ |
| 16h             | $69.5 \pm 0.2$ |
| 1d              | $68.6 \pm 0.2$ |
| 2d              | $66.4 \pm 0.3$ |
| 4d              | $64.6 \pm 0.2$ |
| 8d              | $63.2 \pm 0.3$ |
| 16d             | $62.4 \pm 0.3$ |
| 32d             | $61.1 \pm 0.2$ |

C: the original collagen; 0: the regenerated collagen immediately after the dissolution of collagen in the DES; 8h, 16h, 1d, 2d, 4d, 8d, 16d, 32d: the regenerated collagens from the dissolution of collagen in the DES for 8 hours, 16 hours, 1 day, 2 days, 4 days, 8 days, 16 days, and 32 days,

**Table S7.** The content of Zn in the regenerated collagen films prepared under different dialysis times.

| Collagen films | Content of Zn (% w/w) |
|----------------|-----------------------|
| A              | $0.166 \pm 0.0014$    |
| B              | $0.062 \pm 0.0006$    |
| C              | $0.017 \pm 0.0004$    |
| D              | $0.003 \pm 0.0002$    |

A, B, C, and D: the regenerated collagen films derived from the collagen solutions dissolved in the DES of  $ZnCl_2:FA(1:5)$  containing 40% (w/w) water and dialysed for 1, 2, 3, and 4 days, respectively.
